1  
2  
3  
4  
5  
6  
7

## Trajectories of Neurologic Recovery after Traumatic Brain Injury

July 21, 2023

| Name                               | Affiliation                                                                                                  | Email                                                                        |
|------------------------------------|--------------------------------------------------------------------------------------------------------------|------------------------------------------------------------------------------|
| Henry E. Wang, MD, MS              | The Ohio State University,<br>Department of Emergency Medicine                                               | <a href="mailto:henry.wang@osumc.edu">henry.wang@osumc.edu</a>               |
| Chengcheng Hu, PhD                 | The University of Arizona<br>Department of Biostatistics, Mel and Enid<br>Zuckerman College of Public Health | <a href="mailto:hucc@arizona.edu">hucc@arizona.edu</a>                       |
| Bruce J. Barnhart, MSN, RN,<br>CEP | The University of Arizona College of Medicine-<br>Phoenix,<br>Department of Emergency Medicine               | <a href="mailto:bbarnhart@aemrc.arizona.edu">bbarnhart@aemrc.arizona.edu</a> |
| Jan O. Jansen, MBBS, PhD           | University of Alabama at Birmingham<br>Department of Surgery<br>Division of Trauma, Burns and Critical Care  | <a href="mailto:jjansen@uabmc.edu">jjansen@uabmc.edu</a>                     |
| Daniel W. Spaite, MD               | The University of Arizona College of Medicine,<br>Department of Emergency Medicine                           | <a href="mailto:Dan@aemrc.arizona.edu">Dan@aemrc.arizona.edu</a>             |

8  
9

10 **Word Count:** 2,370 words

11

12 **Keywords:** traumatic brain injury, outcomes, recovery

13

14 **Corresponding Author:**

15

16 Henry E. Wang, MD, MS  
17 Department of Emergency Medicine  
18 The Ohio State University  
19 376 W. 10<sup>th</sup> Ave  
20 760 Prior Hall  
21 Columbus, OH 43210  
22 205-410-1267  
23 [henry.wang@osumc.edu](mailto:henry.wang@osumc.edu)

24

25 Reprints not available from the authors.

26

27

28

29 **ACKNOWLEDGEMENTS**

30 This analysis was prepared using research materials obtained from the National Heart Lung and Blood  
31 Institute (NHLBI) Biologic Specimen and Data Repository Information Coordinating Center (BioLINCC)  
32 and does not necessarily reflect the opinions or views of NHLBI.  
33

34 **PRESENTATION**

35 Presented at the National Associated of EMS Physicians Annual Meeting, Tampa, Florida, January 27,  
36 2023.  
37  
38

39 **AUTHOR CONTRIBUTIONS**

40 All authors have made substantial contributions to all of the following: (1) the conception and design of  
41 the study, or acquisition of data, or analysis and interpretation of data, (2) drafting the article or revising it  
42 critically for important intellectual content, (3) final approval of the version to be submitted.  
43

44 **DISCLOSURES**

45 There is no overlap with previous publications other than the parent Resuscitation Outcomes Consortium  
46 Hypertonic Saline Trial, and we confirm that the manuscript, including related data, figures and tables,  
47 has not been published previously and that the manuscript is not under consideration elsewhere at this  
48 time.  
49

50

51

Long-Term Outcomes of TBI  
Page 3 of 24

52 **ABSTRACT**

53 BACKGROUND: Little is known about the trajectory over time of neurologic recovery after traumatic  
54 brain injury (TBI). We sought to determine long-term changes in neurologic status after prehospital  
55 clinical trial interventions for acute TBI.

56 METHODS: We used data from the Resuscitation Outcomes Consortium Hypertonic Saline (ROC HS)  
57 TBI Trial. The trial included adult TBI, with Glasgow Coma Scale (GCS) $\leq$ 8 and excluded those with  
58 shock (systolic blood pressure (SBP) $\leq$ 70, or SBP 71-90 with HR $\geq$ 108). The primary outcome was  
59 Glasgow Outcome Scale-Extended (GOS-E; 1=dead, 8=no disability) determined at: a) hospital discharge  
60 and b) 6-month follow-up. We analyzed changes in GOS-E between hospital discharge and 6-month  
61 follow-up by examining median changes with exact 95% confidence intervals (CI), mean changes with  
62 bootstrapped 95% CIs and Sankey graphs. We repeated the analysis for the high acuity subset of patients  
63 undergoing prehospital advanced airway insertion.

64 RESULTS: Among 1,279 TBI subjects included in the analysis, GOS-E categories at hospital discharge  
65 were: favorable (GOS-E 5-8) 220 (17.2%), unfavorable (GOS-E 2-4) 664 (51.9%), dead (GOS-E 1) 321  
66 (25.1%), missing 74 (5.8%). GOS-E categories at 6-month follow-up were: favorable 459 (35.9%),  
67 unfavorable 279 (21.8%), dead 346 (27.1%), missing 195 (15.2%). Among initial TBI survivors with  
68 complete GOS-E, >96% followed one of three neurologic recovery trajectories: 1) favorable to favorable  
69 (20.0%), 2) unfavorable to favorable (40.3%), and 3) unfavorable to unfavorable (36.0%). Few patients  
70 deteriorated from favorable to unfavorable neurologic status and there were few additional deaths.

71 CONCLUSION: Neurologic recovery after TBI follows distinct trajectories. Among those with TBI and  
72 unfavorable neurologic status at hospital discharge, almost half will improve to favorable neurologic  
73 status at six months. Among those with favorable neurologic status at discharge, very few worsen to

## Long-Term Outcomes of TBI

Page 4 of 24

- 74 unfavorable neurologic status or death at six months. These findings have important implications for TBI
- 75 clinical care, research and trial design.

Long-Term Outcomes of TBI  
Page 5 of 24

76 **INTRODUCTION**

77 The annual burden of traumatic brain injury (TBI) in the United States is enormous, associated with 2.2  
78 million emergency department visits, 280,000 hospitalizations, 52,000 deaths, and more than \$60 billion  
79 in economic costs.<sup>1,2</sup> While early mitigation of secondary injury is a priority, few interventions have  
80 proven effective for TBI treatment. Clinical trials offer information to support the effectiveness of novel  
81 medical therapies. An essential consideration in clinical trial design is the selection of appropriate  
82 outcomes, which must be relevant to the disease, plausibly linked to the intervention, objectively  
83 measurable, and pertinent to patients and caregivers.

84 The timing of outcomes is important in TBI research.<sup>3</sup> Measurement of outcomes at short-term intervals  
85 (such as hospital discharge) is feasible, but may fail to capture changes in important aspects of health  
86 status. This is highly relevant as functional recovery from TBI may take months, or even years after the  
87 initial injury. Measurement of outcomes at long-term intervals (such as 6-month follow-up) may better  
88 capture changes in health status but is logistically difficult, hence increasing trial sample size and costs.  
89 Understanding the course of health recovery is important to inform clinical trial design, but there are few  
90 studies characterizing changes in neurologic or vital status after TBI.

91 We sought to characterize trajectories of neurologic recovery among TBI patients enrolled in the  
92 Resuscitation Outcomes Consortium Hypertonic Saline (ROC-HS) Trial.<sup>4</sup>

93

94

95 **METHODS**

96 *Study Design*

97 We conducted a secondary analysis of the TBI cohort enrolled in the ROC-HS Trial. This analysis was  
98 classified as not human subjects research by the University of Arizona Institutional Review Board.

99 *Setting – the Resuscitation Outcomes Consortium Hypertonic Saline Trial*

100 The ROC-HS was a multicenter clinical trial testing the effectiveness of prehospital hypertonic fluids  
101 upon outcomes after severe traumatic brain injury (TBI) and hemorrhagic shock.<sup>4,5</sup> ROC consisted of 114  
102 emergency medical services (EMS) agencies from 11 communities in the United States and Canada. The  
103 trial included enrollment of two cohorts: 1) TBI and 2) hemorrhagic shock. Inclusion criteria for the TBI  
104 cohort were: blunt mechanism of injury, age 15 years or older, Glasgow Coma Scale (GCS) score  $\leq 8$  and  
105 ineligibility for the hemorrhagic shock cohort. The hemorrhagic shock cohort included patients with  
106 systolic blood pressure of  $\leq 70$  mm Hg or 71-90 mmHg with a concomitant heart rate  $\geq 108$  beats per  
107 minute. Key exclusion criteria included known or suspected pregnancy, prisoners, transferred patients,  
108 out-of-hospital cardiopulmonary resuscitation, administration of  $>2000$  ml of crystalloid intravenous fluid  
109 or any amount of colloid or blood products. Patients with concomitant head injury and hypotension were  
110 included in the shock cohort.

111 The three blinded trial interventions included a 250 ml bolus of: 1) 7.5% saline (hypertonic saline), 2)  
112 7.5% saline with 6% dextran 70 (hypertonic saline/dextran), and 3) 0.9% saline (normal saline),  
113 randomized in a ratio of 1:1:1.4. Study fluids were provided in identical intravenous bags; EMS providers  
114 were blinded to the fluid contents. The trial met prespecified criteria for futility after enrollment of 1,282  
115 TBI and 853 hemorrhagic shock. Patient enrollment occurred during 2006-2009.

Long-Term Outcomes of TBI  
Page 7 of 24

116 *Selection of Participants*

117 We included all patients enrolled in the TBI cohort of the parent trial.

118 *Outcomes*

119 The outcomes of interest for this analysis were neurologic outcome and death at hospital discharge and 6-  
120 month follow-up. The trial determined neurologic status using the Glasgow Outcome Score-Extended  
121 (GOSE).<sup>6,7</sup> The Glasgow Outcome Scale (GOS) was first described by Jennett and Bond as an assessment  
122 of global neurologic outcome and death after severe brain injury.<sup>8</sup> Later extensions improved its  
123 sensitivity.<sup>6,7</sup> Research teams determined GOS-E at hospital discharge using a structured telephone  
124 survey.<sup>9</sup> If the patient was unable to respond to the survey, family members or caregivers provided the  
125 requested information, an approach that has been previously validated.<sup>9,10</sup> If the neurologic status survey  
126 occurred after six months, we considered the assessment to have occurred at six months. For patients who  
127 died after hospital discharge, we assigned a 6-month GOS-E=1. For patients who died before hospital  
128 discharge, we assigned GOS-E=1 for both hospital and 6-month follow-up.

129 *Data Analysis*

130 We excluded patients where hospital discharge occurred after the 6-month follow-up. We assessed  
131 characteristics of the study population, including patient demographics (age, sex), clinical presentation  
132 (injury mechanism, prehospital Glasgow Coma Scale, revised trauma score (RTS), injury severity score  
133 (ISS), head abbreviated injury score (AIS)), EMS care (air medical transport, advanced airway placement,  
134 the prehospital time interval), and outcomes (hospital survival, 28-day survival, intensive care unit-free  
135 days at 28 days, and GOS-E at hospital discharge and six months). We determined GOS-E changes  
136 between hospital discharge and six months by examining median changes with exact 95% CIs and means  
137 change with bootstrapped 95% CIs. We stratified neurologic status according to severity categories: GOS-

## Long-Term Outcomes of TBI

Page 8 of 24

138 E 1 = dead, 2-4 = unfavorable neurologic status, and 5-8 = favorable neurologic status. We also used

139 Sankey graphs to depict transitions between GOS-E categories at hospital discharge and six months.

140 We repeated the analysis limited to the higher acuity subset of patients undergoing prehospital advanced

141 airway management (endotracheal intubation, supraglottic airways or surgical airways). In an additional

142 analysis, we focused on the subset of patients with unfavorable neurologic status at hospital discharge,

143 distinguishing those who improved to favorable neurologic status with those who remained in

144 unfavorable neurologic status at 6-month follow-up. Using multi-covariate logistic regression, we

145 identified the baseline characteristics independently associated with improvement to good 6-month

146 neurologic function through a backward elimination process starting from a model including all baseline

147 characteristics that were associated with the outcome in univariate analysis at the significance level of

148 0.20.

149 Some authors advocate extending the GOS-E range to 4-8 for classifying favorable neurologic status,

150 noting that many patients with GOS-E=4 (upper severe disability) are able to function at home without

151 supervision for more than 8 hours daily.<sup>11</sup> In a sensitivity analysis, we repeated the analysis of the full

152 cohort defining favorable neurologic status as GOS-E 4-8 and unfavorable neurologic status as GOS-E 2-

153 3.

154 We conducted all analyses using SAS (Cary, North Carolina) and Microsoft Excel (Redmond,

155 Washington) with the Power-User add-in (Power-User SAS, Paris, France).

156



## Long-Term Outcomes of TBI

Page 9 of 24

### 157 **RESULTS**

158 The parent trial enrolled a total of 1,282 TBI patients. We excluded three patients who were discharged  
159 from the hospital more than six months after injury, leaving 1,279 in the analysis. Trial interventions  
160 were: hypertonic saline+dextrose 357 (27.9%), hypertonic saline 340 (26.6%), and normal saline 582  
161 (45.5%). Enrolled subjects were mostly male and suffered primarily blunt injury (Table 1). The acuity of  
162 the population was high, with high RTS and ISS. Approximately 60% received successful prehospital  
163 advanced airway insertion, and approximately 40% underwent air medical transport. One-third of the  
164 population experienced severe TBI (head AIS 3 or 4), and one-third suffered critical TBI (head AIS 5-6);  
165 one-fifth of the population did not have a significant brain injury. Approximately three-fourths were alive  
166 at 28-days after injury. Among the 945 patients alive at hospital discharge, median time from injury to  
167 discharge was 14 days (IQR 4, 30), and median time from hospital discharge to 6-month outcome  
168 interview was 176 days (IQR 158, 190).

169 At hospital discharge, favorable neurologic status, unfavorable neurologic status and death comprised  
170 17.2%, 51.9% and 25.1% of the full cohort. (Table 2) At 6-month follow-up favorable neurologic status,  
171 unfavorable neurologic status and death comprised 35.9%, 21.8% and 27.1% of the cohort.

172 Neurologic status was available at both hospital discharge and 6-month follow-up for 1,066 of 1,279  
173 (83.3%) subjects. Of this subset, 30.1% were dead at hospital discharge. Of the remaining TBI survivors  
174 most (>96%) followed one of three neurologic status trajectories: 1) favorable to favorable (20.0%), 2)  
175 unfavorable to favorable (40.3%), and 3) unfavorable to unfavorable (36.0%). (Table 3, Figure 1). Of the  
176 220 patients with favorable neurologic status at hospital discharge, only 7 (1.0%) deteriorated to  
177 unfavorable neurologic status or death. Compared with hospital discharge, there were only 23 additional  
178 deaths at 6-month follow-up.

## Long-Term Outcomes of TBI

Page **10** of **24**

179 At hospital discharge, favorable neurologic status, unfavorable neurologic status and death comprised  
180 12.5%, 56.2% and 28.5% of the advanced airway cohort. (Appendix 1) At 6-month follow-up favorable  
181 neurologic status, unfavorable neurologic status or death comprised 35.9%, 22.7% and 30.1% of the  
182 cohort.

183 Neurologic status was available at both hospital discharge and 6-month follow-up for 679 of 771 (88.0%)  
184 advanced airway subjects. Of this subset, 32.4 % were dead at hospital discharge. Of the remaining TBI  
185 survivors, most (>97%) followed one of three neurologic status trajectories: 1) favorable to favorable  
186 (14.4%), 2) unfavorable to favorable (45.3%), and 3) unfavorable to unfavorable (37.7%). (Appendices 2  
187 and 3). Of the 220 patients with favorable neurologic status at hospital discharge, only 2 (0.4%)  
188 deteriorated to unfavorable neurologic status or death. Compared with hospital discharge, there were only  
189 12 additional deaths at 6-month follow-up.

190 In the full cohort, younger age, higher Revised Trauma Score, lower head AIS score, lower Marshall  
191 Score, and absence of hypotension at ED were independently associated with progression from  
192 unfavorable neurologic status (GOS-E 2-4) at hospital discharge to good neurologic status (GOS-E 5-8) at  
193 6-month follow-up. (Appendix 4, Table 4)

194 In a sensitivity analysis recategorizing favorable neurologic status as GOS-E 4-8 and unfavorable  
195 neurologic status as GOS-E 2-3, there were only minimal differences in the percentage of surviving  
196 patients transitioning from unfavorable to favorable neurologic status (41.5%). (Appendices 5 and 6)

197

198

199

Long-Term Outcomes of TBI  
Page 11 of 24

200 **DISCUSSION**

201 In this analysis of data from the ROC-HS trial, the majority of TBI patients alive at hospital discharge  
202 subsequently exhibited one of three neurologic recovery trajectories: 1) good neurologic status at both  
203 hospital discharge and 6-month follow-up, 2) poor neurologic status at hospital discharge improving to  
204 good neurologic outcome at 6-month follow-up, and 3) poor neurologic status at both hospital discharge  
205 and 6-month follow-up. Among those with initially unfavorable neurologic status, almost half improved  
206 to favorable neurologic status. Very few patients with favorable neurologic status at hospital discharge  
207 deteriorated or died at 6-month follow-up. There were also few additional deaths at 6-month follow-up.

208 Our findings have important implications for TBI research and clinical trial design. If the objective of a  
209 novel intervention is to mitigate death after TBI, then hospital survival may be suitable as the primary  
210 research outcome, as the overall number of deaths does not significantly increase at six months. For  
211 interventions targeting optimization of neurologic outcome, extending observation to six months or later  
212 may be necessary. However, researchers can likely focus attention on the subset with unfavorable  
213 neurologic status at hospital discharge, as half of this group is likely to improve to favorable neurologic  
214 status at six months. It also appears that if differences in neurologic outcome are observed at hospital  
215 discharge, one may expect even larger widening of effect at later time points. Similarly, our observations  
216 suggest that studies focused on TBI rehabilitation will likely target only half of the total TBI population; -  
217 i.e., those with unfavorable neurologic status at hospital discharge.

218 Our findings also reinforce existing perspectives regarding the trajectories of TBI neurologic recovery. As  
219 suggested by the current and prior studies, the general ominous prognosis of patients with poor neurologic  
220 status at hospital discharge may be unwarranted; over the 6-24 months following TBI, almost half of  
221 patients will improve from unfavorable to favorable neurologic status.<sup>11-16</sup> For example, in an analysis of  
222 484 patients from the TRACK-TBI cohort study, McCrea, et al. found that at 12 months, 52% of patients  
223 with severe TBI (defined as initial GCS 3-8) achieved favorable neurologic outcomes.<sup>11</sup> The distinction of

## Long-Term Outcomes of TBI

Page 12 of 24

224 our study is that the data specifically originated from TBI patients enrolled in a clinical trial. Among  
225 initial survivors at hospital discharge, we observed only 23 additional deaths at six months, representing  
226 1.8% of the study population, rates much lower than in prior cohorts.<sup>11,13</sup> This may be due to the fact that  
227 a TBI clinical trial population will invariably include select patients without head CT abnormalities. A  
228 strength of the current analysis is that the rates of GOS-E missingness were 6-15%, much lower than the  
229 30-50% missingness observed in prior cohorts.<sup>11-13</sup> These observations highlight the importance of  
230 strategies to mitigate and manage missing outcomes in TBI trials.

231 We also offer a novel analytic approach to better depict and conceptualize neurologic recovery after TBI.  
232 Prior studies presented the distribution of GOS-E categories at discrete time points, characterizing the  
233 heterogeneity of the population but not specifically identifying the transitions of neurological status  
234 between discharge and follow-up.<sup>11-13</sup> Our use of Sankey graphs addresses this limitation by depicting  
235 both the distributions of, and the transitions between, GOS-E categories. Other studies have characterized  
236 TBI trajectories using a range of sophisticated analytic techniques, such as quadratic models and least  
237 absolute shrinkage and selection operator (LASSO).<sup>14,16</sup> Our approach is simpler, more intuitive, and  
238 clarifies that neurologic recovery after TBI entails seven potential trajectories, of which four are dominant  
239 (Table 3). Among these trajectories, the transition from unfavorable to favorable neurologic status was the  
240 largest cohort and of greatest interest. We believe these results will be helpful for designing TBI studies  
241 and trials, focusing attention and resources on the subset of patients with initial unfavorable neurologic  
242 status. This may provide an efficient approach since it appears that both death and neurological  
243 deterioration are very infrequent after discharge.

244

245

246 **LIMITATIONS**

247 Our observations must be interpreted in light of the design of the parent trial. The ROC data are now  
248 almost 15 years old, and repeating this analysis in a more recent data set is merited. The ROC-HS Trial  
249 included high acuity TBI with an initial presenting GCS  $\leq 8$ . Thus, the trial may have included some  
250 unconscious subjects without intracranial injuries (for example, those with intoxication masquerading as  
251 TBI) as well as seemingly conscious patients with severe intracranial injuries. Missingness of GOS-E was  
252 also prevalent, influencing 17% of the cohort. If all the missing values were included in sensitivity  
253 analyses as “favorable” or “unfavorable” neurologic status, this would have slightly shifted the proportion  
254 of patients in each neurologic trajectory. We did not study other measures of neurologic and functional  
255 status such as the Functional Independence Measure, the Disability Rating Scale or quality of life.<sup>3,17</sup> We  
256 also did not study other neurologic sequelae such as seizures, dementia and Parkinsonism.<sup>18</sup>

257

258

## Long-Term Outcomes of TBI

Page 14 of 24

### 259 **CONCLUSION**

260 Neurologic recovery after TBI follows distinct trajectories. Among TBI patients with unfavorable  
261 neurologic status at hospital discharge, almost half will progress to favorable neurologic status at six  
262 months. Very few TBI victims experience worsened neurologic status or death at six months. These  
263 observations offer key perspectives to guide TBI research and clinical trial design.

264

265

266

## Long-Term Outcomes of TBI

Page **15** of **24**

268 **TRANSPARENCY, RIGOR AND REPRODUCIBILITY**

269 This study was a secondary analysis of existing data resulting from the Resuscitation Outcomes  
270 Consortium Hypertonic Saline Traumatic Brain Injury Trial. The parent trial was registered at  
271 [clinicaltrials.gov](https://clinicaltrials.gov) (NCT00316004). The analysis plan for this secondary analysis was not formally pre-  
272 registered. Sample size estimates were not determined for this secondary analysis. The parent trial  
273 enrolled a total of 1,282 TBI patients, of which 1,279 with complete outcomes were included in this  
274 secondary analysis. The analysis was carried out on a de-identified data set without linkage to individual  
275 subjects. Data were acquired from the NHLBI BioLINCC repository. The software used to perform the  
276 analyses (SAS and Microsoft Excel) are widely available. The key inclusion criteria (e.g., primary  
277 diagnosis or prognostic factor) are established standards in the field. The sample sizes and degrees of  
278 freedom reflect the number of independent measurements (i.e., number of individual participants). No  
279 replication or external validation studies have been performed or are planned/ongoing at this time to our  
280 knowledge. Data for this study are available from the NHLBI BioLINCC. This article will not be  
281 available for Open Access.

282



283 **REFERENCES**

- 284 1. Finkelstein E, Corso PS, Miller TR. The incidence and economic burden of injuries in the United  
285 States. Oxford ; New York: Oxford University Press; 2006.
- 286 2. Corrigan JD, Selassie AW, Orman JA. The epidemiology of traumatic brain injury. *J Head  
287 Trauma Rehabil.* 2010;25(2):72-80.
- 288 3. Shukla D, Devi BI, Agrawal A. Outcome measures for traumatic brain injury. *Clinical Neurology  
289 and Neurosurgery.* 2011;113(6):435-441.
- 290 4. Bulger EM, May S, Brasel KJ, et al. Out-of-hospital hypertonic resuscitation following severe  
291 traumatic brain injury: a randomized controlled trial. *JAMA.* 2010;304(13):1455-1464.
- 292 5. Bulger EM, May S, Kerby JD, et al. Out-of-hospital hypertonic resuscitation after traumatic  
293 hypovolemic shock: a randomized, placebo controlled trial. *Annals of surgery.* 2011;253(3):431-  
294 441.
- 295 6. Wilson JT, Pettigrew LE, Teasdale GM. Structured interviews for the Glasgow Outcome Scale  
296 and the extended Glasgow Outcome Scale: guidelines for their use. *J Neurotrauma.*  
297 1998;15(8):573-585.
- 298 7. Jennett B, Snoek J, Bond MR, Brooks N. Disability after severe head injury: observations on the  
299 use of the Glasgow Outcome Scale. *J Neurol Neurosurg Psychiatry.* 1981;44(4):285-293.
- 300 8. Jennett B, Bond M. Assessment of outcome after severe brain damage. *Lancet.*  
301 1975;1(7905):480-484.
- 302 9. Pettigrew LE, Wilson JT, Teasdale GM. Assessing disability after head injury: improved use of  
303 the Glasgow Outcome Scale. *J Neurosurg.* 1998;89(6):939-943.
- 304 10. Hall K, Cope DN, Rappaport M. Glasgow Outcome Scale and Disability Rating Scale:  
305 comparative usefulness in following recovery in traumatic head injury. *Arch Phys Med Rehabil.*  
306 1985;66(1):35-37.
- 307 11. McCrea MA, Giacino JT, Barber J, et al. Functional Outcomes Over the First Year After  
308 Moderate to Severe Traumatic Brain Injury in the Prospective, Longitudinal TRACK-TBI Study.  
309 *JAMA Neurol.* 2021;78(8):982-992.
- 310 12. Puffer RC, Yue JK, Mesley M, et al. Recovery Trajectories and Long-Term Outcomes in  
311 Traumatic Brain Injury: A Secondary Analysis of the Phase 3 Citicoline Brain Injury Treatment  
312 Clinical Trial. *World Neurosurg.* 2019;125:e909-e915.
- 313 13. Wilkins TE, Beers SR, Borrasso AJ, et al. Favorable Functional Recovery in Severe Traumatic  
314 Brain Injury Survivors beyond Six Months. *J Neurotrauma.* 2019;36(22):3158-3163.
- 315 14. Pretz CR, Dams-O'Connor K. Longitudinal description of the glasgow outcome scale-extended  
316 for individuals in the traumatic brain injury model systems national database: a National Institute  
317 on Disability and Rehabilitation Research traumatic brain injury model systems study. *Arch Phys  
318 Med Rehabil.* 2013;94(12):2486-2493.
- 319 15. Puffer RC, Yue JK, Mesley M, et al. Long-term outcome in traumatic brain injury patients with  
320 midline shift: a secondary analysis of the Phase 3 COBRIT clinical trial. *J Neurosurg.*  
321 2018;131(2):596-603.
- 322 16. Rubin ML, Yamal JM, Chan W, Robertson CS. Prognosis of Six-Month Glasgow Outcome Scale  
323 in Severe Traumatic Brain Injury Using Hospital Admission Characteristics, Injury Severity

## Long-Term Outcomes of TBI

Page 18 of 24

- 324                    Characteristics, and Physiological Monitoring during the First Day Post-Injury. *J Neurotrauma*.  
325                    2019;36(16):2417-2422.
- 326    17.            Linacre JM, Heinemann AW, Wright BD, Granger CV, Hamilton BB. The structure and stability  
327                    of the functional independence measure. *Archives of Physical Medicine and Rehabilitation*.  
328                    1994;75(2):127-132.
- 329    18.            Bazarian JJ, Cernak I, Noble-Haeusslein L, Potolicchio S, Temkin N. Long-term neurologic  
330                    outcomes after traumatic brain injury. *J Head Trauma Rehabil*. 2009;24(6):439-451.
- 331    19.            Maiden MJ, Cameron PA, Rosenfeld JV, Cooper DJ, McLellan S, Gabbe BJ. Long-Term  
332                    Outcomes after Severe Traumatic Brain Injury in Older Adults. A Registry-based Cohort Study.  
333                    *Am J Respir Crit Care Med*. 2020;201(2):167-177.
- 334
- 335
- 336

Long-Term Outcomes of TBI  
Page 19 of 24

337 **TABLE 1**

338 Characteristics of 1,279 patients enrolled in the Resuscitation Outcomes Consortium Hypertonic Saline  
339 Traumatic Brain Injury (TBI) trial.

340

| Characteristic                                                 | Frequency      |
|----------------------------------------------------------------|----------------|
| Age (year), mean (SD)                                          | 39 (18.5)      |
| Sex, n (%)                                                     |                |
| Male                                                           | 973 (76.1%)    |
| Female                                                         | 304 (23.7%)    |
| Unknown                                                        | 2 (0.2%)       |
| Race                                                           |                |
| Asian                                                          | 40 (3.1%)      |
| Black                                                          | 109 (8.5%)     |
| White                                                          | 629 (49.2%)    |
| Other                                                          | 45 (3.5%)      |
| Unknown                                                        | 456 (35.7%)    |
| Hispanic                                                       |                |
| No                                                             | 662 (51.8%)    |
| Yes                                                            | 126 (9.9%)     |
| Unknown/Not noted                                              | 491 (38.4%)    |
| Injury Mechanism, n (%)                                        |                |
| Blunt                                                          | 1258 (98.4%)   |
| Penetrating                                                    | 18 (1.4%)      |
| Unknown                                                        | 3 (0.2%)       |
| Prehospital Glasgow Coma Scale, median (IQR)                   | 5 (3, 7)       |
| Hospital Admission Glasgow Coma Scale, median (IQR)            | 3 (3, 7)       |
| Lowest Prehospital Systolic Blood Pressure, mmHg, median (IQR) | 120 (102, 136) |
| Lowest ED Systolic Blood Pressure, mmHg, median (IQR)          | 111 (94, 126)  |
| Systolic Blood Pressure on Hospital Admission, median (IQR)    | 140 (121, 157) |
| Systolic Blood Pressure on Hospital Admission, mean (SD)       | 139.2 (33.1)   |
| Revised Trauma Score (RTS), mean (SD)                          | 5 (1.2)        |
| Injury severity score (ISS), median (IQR)                      | 26 (16, 36)    |
| Maximum Head AIS, n (%)                                        |                |
| 0                                                              | 236 (18.5%)    |
| 1                                                              | 6 (0.5%)       |
| 2                                                              | 113 (8.8%)     |
| 3                                                              | 161 (12.6%)    |
| 4                                                              | 274 (21.4%)    |
| 5                                                              | 452 (35.3%)    |
| 6                                                              | 5 (0.4%)       |
| Unknown                                                        | 32 (2.5%)      |
| Marshall Score, first head CT, n (%)                           |                |
| Diffuse Injury I                                               | 373 (29.2%)    |
| Diffuse Injury II                                              | 433 (33.9%)    |
| Diffuse Injury III                                             | 151 (11.8%)    |
| Diffuse Injury IV                                              | 51 (4.0%)      |
| Mass Lesion                                                    | 207 (16.1%)    |
| Other                                                          | 16 (1.3%)      |
| Unknown                                                        | 48 (3.8%)      |

## Long-Term Outcomes of TBI

Page 20 of 24

|                                            |             |
|--------------------------------------------|-------------|
| Prehospital Advanced Airway, n (%)         |             |
| Not attempted                              | 460 (36.0%) |
| Attempted, unsuccessful                    | 46 (3.6%)   |
| Successful                                 | 771 (60.3%) |
| Unknown                                    | 2 (0.2%)    |
| Air Transport, n (%)                       |             |
| No                                         | 772 (60.4%) |
| Yes                                        | 504 (39.4%) |
| Unknown                                    | 3 (0.2%)    |
| Total Prehospital Time (min), median (IQR) | 50 (38, 67) |
| Trial Intervention, n (%)                  |             |
| Hypertonic Saline + Dextran                | 357 (27.9%) |
| Hypertonic Saline                          | 340 (26.6%) |
| Normal Saline                              | 582 (45.4%) |
| Survival at Hospital Discharge, n (%)      |             |
| No                                         | 321 (25.1%) |
| Yes                                        | 945 (73.9%) |
| Unknown                                    | 13 (1.0%)   |
| 28-day Survival, n (%)                     |             |
| No                                         | 312 (24.4%) |
| Yes                                        | 957 (74.8%) |
| Unknown                                    | 10 (0.8%)   |
| ICU-free Days through Day 28, median (IQR) | 19 (0, 27)  |

---

Long-Term Outcomes of TBI  
Page 21 of 24

**TABLE 2**

Comparison of neurologic status (Glasgow Outcome Scale-Extended - GOS-E) at hospital discharge and 6-month follow-up among patients enrolled in the Resuscitation Outcomes Consortium Hypertonic Saline Traumatic Brain Injury (TBI) trial. Includes full cohort (n=1,279). Deaths assigned GOS-E=1. GOS-E 2-4 classified as unfavorable neurologic status. GOS-E 5-8 classified as favorable neurologic status. Shaded cells indicate transitions between favorable and unfavorable neurologic status or death.

|                                 |                             | GOS-E Classification<br>GOS-E at 6-Month Follow-Up |           |           |           |                              |            |          |                          |                             |              |
|---------------------------------|-----------------------------|----------------------------------------------------|-----------|-----------|-----------|------------------------------|------------|----------|--------------------------|-----------------------------|--------------|
|                                 |                             | Favorable<br>n=459 (35.9%)                         |           |           |           | Unfavorable<br>n=279 (21.8%) |            |          | Dead<br>n=346<br>(27.1%) | Missing<br>n=195<br>(15.2%) | TOTAL        |
| GOS-E Classification            | GOS-E at Hospital Discharge | 8                                                  | 7         | 6         | 5         | 4                            | 3          | 2        | 1                        | Missing                     |              |
| Favorable<br>n=200<br>(17.2%)   | 8                           | 57                                                 | 9         | 6         | 3         | 2                            | 0          | 0        | 0                        | 39                          | 116          |
|                                 | 7                           | 17                                                 | 4         | 1         | 3         | 0                            | 0          | 0        | 0                        | 9                           | 34           |
|                                 | 6                           | 20                                                 | 6         | 3         | 6         | 1                            | 0          | 0        | 1                        | 12                          | 49           |
|                                 | 5                           | 4                                                  | 7         | 2         | 1         | 1                            | 1          | 0        | 1                        | 4                           | 21           |
| Unfavorable<br>n=664<br>(51.9%) | 4                           | 35                                                 | 16        | 9         | 11        | 17                           | 8          | 0        | 0                        | 14                          | 110          |
|                                 | 3                           | 78                                                 | 48        | 58        | 44        | 77                           | 131        | 1        | 9                        | 52                          | 498          |
|                                 | 2                           | 1                                                  | 0         | 0         | 0         | 3                            | 25         | 6        | 12                       | 9                           | 56           |
| Dead n=321<br>(25.1%)           | 1                           | 0                                                  | 0         | 0         | 0         | 0                            | 0          | 0        | 321                      | 0                           | 321          |
| Missing n=74<br>(5.8%)          | Missing                     | 6                                                  | 2         | 1         | 1         | 1                            | 4          | 1        | 2                        | 56                          | 74           |
|                                 | <b>TOTAL</b>                | <b>218</b>                                         | <b>92</b> | <b>80</b> | <b>69</b> | <b>102</b>                   | <b>169</b> | <b>8</b> | <b>346</b>               | <b>195</b>                  | <b>1,279</b> |

 No change between favorable/unfavorable status or death  
 Improvement in neurologic status  
 Decline in neurologic status or death

## Long-Term Outcomes of TBI

Page 22 of 24

### **TABLE 3**

Trajectories of neurologic status between hospital discharge and 6-month follow-up among patients enrolled in the Resuscitation Outcomes Consortium Hypertonic Saline Traumatic Brain Injury (TBI) trial. Includes 1,066 of 1,279 TBI subjects with complete neurologic status at both hospital discharge and 6-month follow-up. Neurologic status defined as: favorable GOS-E 5-8, unfavorable GOS-E 2-4, dead GOS-E 1.

| <b>Neurologic Trajectory<br/>(Hospital Discharge → 6-Month Follow-Up)</b> | <b>Full Cohort<br/>N (%)</b> | <b>Hospital<br/>Survivors Only<br/>N (%)</b> |
|---------------------------------------------------------------------------|------------------------------|----------------------------------------------|
| 1) Favorable (GOS-E 5-8) → Favorable (GOS-E 5-8)                          | 149 (14.0%)                  | 149 (20.0%)                                  |
| 2) Favorable (GOS-E 5-8) → Unfavorable (GOS-E 2-4)                        | 5 (0.5%)                     | 5 (0.7%)                                     |
| 3) Favorable (GOS-E 5-8) → Dead (GOS-E 1)                                 | 2 (0.2%)                     | 2 (0.3%)                                     |
| 4) Unfavorable (GOS-E 2-4) → Favorable (GOS-E 5-8)                        | 300 (28.1%)                  | 300 (40.3%)                                  |
| 5) Unfavorable (GOS-E 2-4) → Unfavorable (GOS-E 2-4)                      | 268 (25.1%)                  | 268 (36.0%)                                  |
| 6) Unfavorable (GOS-E 2-4) → Dead (GOS-E 1)                               | 21 (2.0%)                    | 21 (2.8%)                                    |
| 7) Dead at Hospital Discharge (GOS-E 1)                                   | 321 (30.1%)                  | N/A                                          |

Long-Term Outcomes of TBI  
Page 23 of 24

**TABLE 4**

Multi-covariate logistic regression of factors associated with improvement from unfavorable (GOS-E 2-4) to favorable neurologic outcome (GOS-E 5-8) among patients enrolled in the Resuscitation Outcomes Consortium Hypertonic Saline Traumatic Brain Injury (TBI) trial. Limited to subset with unfavorable neurologic status at hospital discharge (GOS-E 2-4).

| Variable                                           | OR (95% CI)       |
|----------------------------------------------------|-------------------|
| <b>Age (year)</b>                                  | 0.97 (0.96, 0.98) |
| <b>Revised Trauma Score (RTS)</b>                  | 1.44 (1.20, 1.72) |
| <b>Maximum Head AIS</b>                            |                   |
| 0                                                  | Reference         |
| 1-3                                                | 1.40 (0.75, 2.62) |
| 4                                                  | 1.06 (0.57, 1.97) |
| 5                                                  | 0.61 (0.32, 1.14) |
| <b>Marshall Score, first head CT</b>               |                   |
| Diffuse Injury I/II                                | Reference         |
| Diffuse Injury III/IV                              | 0.50 (0.29, 0.85) |
| Mass Lesion                                        | 0.52 (0.28, 0.98) |
| <b>Hypotension at ED (lowest SBP &lt; 90 mmHg)</b> |                   |
| No                                                 | Reference         |
| Yes                                                | 0.56 (0.34, 0.94) |

Long-Term Outcomes of TBI  
Page 24 of 24

**FIGURE 1**

Sankey graph depicting changes in neurologic status (Glasgow Outcome Scale-Extended - GOS-E) between hospital discharge and 6-month follow-up among patients enrolled in the Resuscitation Outcomes Consortium Hypertonic Saline Trial. N=1,279 patients.



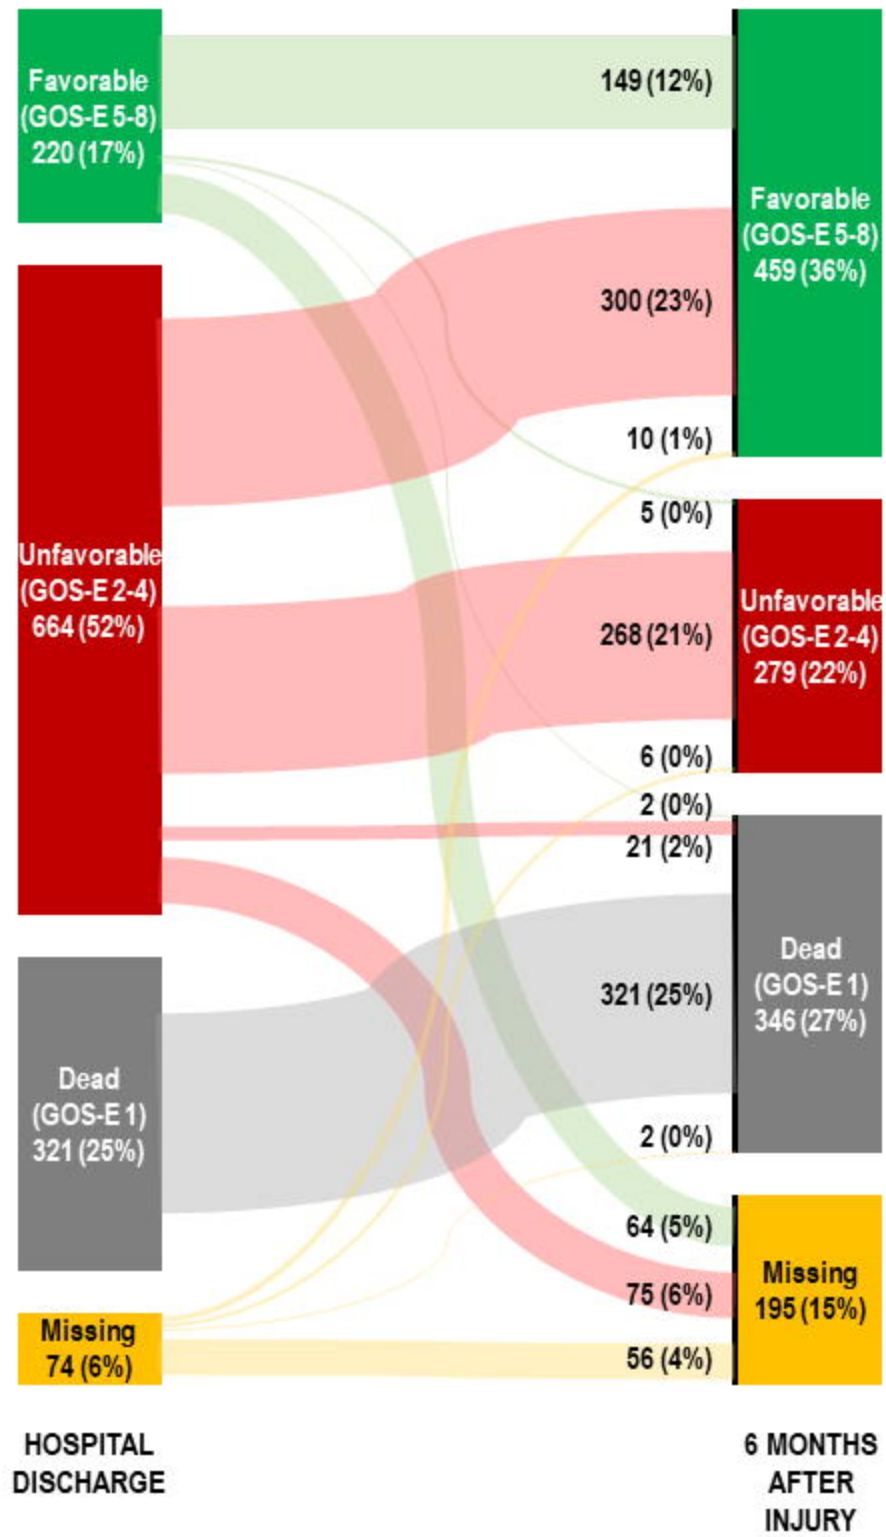

Source: https://medrxiv.org/content/10.1101/2023.09.27.23296251v1.full.pdf
